# Supplementary material
Source: PubMed Central journal article supplement (PMC4011658)
Supplement: NIHMS574266-supplement-supplement_1.pdf [file NIHMS574266-supplement-supplement_1.pdf]

## Supplementary File

### *Items used in variable construction*

#### Parental knowledge

1. During the day, my parents know where I am.
2. My parents know who I am with when I am away from home.
3. My parents know when I do something really well at school or some place else away from home.
4. My parents know when I get into trouble at school or some place else away from home.
5. My parents know when I do not do things they have asked me to do.

#### Parental discipline

1. When my parents ask me to do something and I don't do it right away, they give up.
2. My parents discipline me for something some times, and then other times don't discipline me for same thing.
3. When my parents discipline me, the kind of discipline I get depends on their mood.
4. When I do something wrong, my parents decide on the discipline, I can get out for it.
5. When I do something wrong, my parents lose their temper and yell at me.

#### School adjustment and bonding

1. I like school a lot.
2. I try hard at school.
3. Grades are very important to me.
4. School bores me.
5. I don't feel like I really belong at school.
6. I feel very close to at least one of my teachers.
7. I get along well with my teachers.
8. I feel that teachers are picking on me.

#### Risk and sensation seeking

1. Do what feels good, regardless of the consequences.
2. Do something dangerous because someone dared you to do it.
3. Do crazy things just to see the effect on others.

**Shape and Rate Parameters for Table 2: Parental Knowledge and Drinking**

|                           | Model 1  |           |             |           | Model 2  |           |             |           |  |
|---------------------------|----------|-----------|-------------|-----------|----------|-----------|-------------|-----------|--|
|                           | <i>b</i> | <i>SE</i> | <i>t</i>    | <i>SD</i> | <i>b</i> | <i>SE</i> | <i>t</i>    | <i>SD</i> |  |
| <b>Network Changes</b>    |          |           |             |           |          |           |             |           |  |
| Friends rate (period 1)   | 13.461   | 0.570     | 23.604 ***  | 3.199     | 13.387   | 0.555     | 24.103 ***  | 3.095     |  |
| Friends rate (period 2)   | 27.206   | 1.536     | 17.707 ***  | 8.065     | 26.956   | 1.476     | 18.267 ***  | 7.628     |  |
| Friends rate (period 3)   | 20.637   | 0.841     | 24.525 ***  | 4.633     | 20.624   | 0.844     | 24.427 ***  | 4.642     |  |
| Friends rate (period 4)   | 16.555   | 0.752     | 22.009 ***  | 3.787     | 16.553   | 0.751     | 22.033 ***  | 3.799     |  |
| <b>Behavioral changes</b> |          |           |             |           |          |           |             |           |  |
| Drinking rate (period 1)  | 1.492    | 0.086     | 17.269 ***  | 0.259     | 1.561    | 0.081     | 19.369 ***  | 0.188     |  |
| Drinking rate (period 2)  | 2.166    | 0.137     | 15.772 ***  | 0.342     | 2.310    | 0.154     | 14.987 ***  | 0.408     |  |
| Drinking rate (period 3)  | 3.385    | 0.209     | 16.226 ***  | 0.683     | 3.478    | 0.215     | 16.153 ***  | 0.676     |  |
| Drinking rate (period 4)  | 4.370    | 0.227     | 19.240 ***  | 0.638     | 3.866    | 0.209     | 18.516 ***  | 0.288     |  |
| <b>Shape Parameters</b>   |          |           |             |           |          |           |             |           |  |
| linear shape              | -2.647   | 0.078     | -33.990 *** | 0.420     | -2.315   | 0.081     | -28.579 *** | 0.365     |  |
| quadratic shape           | 1.559    | 0.031     | 49.784 ***  | 0.124     | 1.565    | 0.030     | 52.146 ***  | 0.112     |  |

All values are means across 48 networks, with a total N of 43,299 person/waves

\*\*\**p* < .001. \*\**p* < .01. \**p* < .05. †*p* < .10.
